# Supplementary material
Source: Springer Nature journal article supplement (https://www.springermedizin.de/resource/supplementary/13223_2012_355_MOESM1_ESM.pdf/9597660)
Supplement: MOESM1 [file 9597660]

Table E1. Spearman correlations between immune markers in maternal serum during gestation

|                | Immune markers in maternal serum                              |                       |                       |                       |                       |                       |                    |                     |
|----------------|---------------------------------------------------------------|-----------------------|-----------------------|-----------------------|-----------------------|-----------------------|--------------------|---------------------|
|                | IFN- $\gamma$                                                 | IL-13                 | IL-5                  | IL-6                  | CXCL10                | IL-8                  | IgA                | TGF- $\beta$ 1      |
|                | (In the following order: correlation coefficient, p-value, n) |                       |                       |                       |                       |                       |                    |                     |
| IFN- $\gamma$  | 1                                                             | 0.37<br><.0001<br>161 | 0.36<br><.0001<br>128 | 0.50<br><.0001<br>128 | 0.12<br>0.12<br>161   | 0.10<br>0.25<br>128   | 0.03<br>0.76<br>85 | -0.21<br>0.04<br>84 |
| IL-13          |                                                               | 1                     | 0.77<br><.0001<br>128 | 0.71<br><.0001<br>128 | 0.44<br><.0001<br>161 | 0.41<br><.0001<br>128 | 0.14<br>0.17<br>85 | -0.16<br>0.13<br>84 |
| IL-5           |                                                               |                       | 1                     | 0.80<br><.0001<br>128 | 0.54<br><.0001<br>128 | 0.36<br><.0001<br>128 | 0.11<br>0.31<br>74 | -0.10<br>0.38<br>71 |
| IL-6           |                                                               |                       |                       | 1                     | 0.53<br><.0001<br>128 | 0.42<br><.0001<br>128 | 0.17<br>0.13<br>74 | -0.06<br>0.57<br>71 |
| CXCL10         |                                                               |                       |                       |                       | 1                     | 0.45<br><.0001<br>128 | 0.09<br>0.38<br>85 | 0.01<br>0.88<br>84  |
| IL-8           |                                                               |                       |                       |                       |                       | 1                     | 0.15<br>0.18<br>74 | 0.12<br>0.29<br>71  |
| IgA            |                                                               |                       |                       |                       |                       |                       | 1                  | -0.11<br>0.29<br>82 |
| TGF- $\beta$ 1 |                                                               |                       |                       |                       |                       |                       |                    | 1                   |

Table E2. Spearman correlations between immune markers in breast milk whey

|               | Immune markers in whey                                        |                       |                    |                     |                      |                      |                     |                      |
|---------------|---------------------------------------------------------------|-----------------------|--------------------|---------------------|----------------------|----------------------|---------------------|----------------------|
|               | IFN- $\gamma$                                                 | IL-13                 | IL-5               | IL-6                | CXCL10               | IL-8                 | IgA                 | TGF- $\beta$ 1       |
|               | (In the following order: correlation coefficient, p-value, n) |                       |                    |                     |                      |                      |                     |                      |
| IFN- $\gamma$ | 1                                                             | 0.47<br><.0001<br>115 | 0.05<br>0.60<br>84 | 0.13<br>0.23<br>84  | -0.04<br>0.64<br>115 | 0.06<br>0.57<br>84   | -0.01<br>0.89<br>89 | -0.16<br>0.12<br>86  |
| IL-13         |                                                               | 1                     | 0.09<br>0.37<br>84 | 0.05<br>0.64<br>84  | 0.10<br>0.26<br>115  | 0.40<br>0.0002<br>84 | -0.21<br>0.03<br>89 | -0.28<br>0.008<br>86 |
| IL-5          |                                                               |                       | 1                  | 0.31<br>0.004<br>84 | -0.17<br>0.10<br>84  | 0.01<br>0.89<br>84   | 0.06<br>0.58<br>73  | 0.07<br>0.52<br>71   |

|        |   |        |        |      |        |
|--------|---|--------|--------|------|--------|
| IL-6   | 1 | 0.36   | 0.52   | 0.23 | 0.44   |
|        |   | 0.0007 | <.0001 | 0.04 | <.0001 |
|        |   | 84     | 84     | 73   | 71     |
| CXCL10 | 1 | 0.68   | 0.04   | 0.20 |        |
|        |   |        | <.0001 | 0.70 | 0.06   |
|        |   |        | 84     | 89   | 86     |
| IL-8   |   |        | 1      | 0    | 0.18   |
|        |   |        |        | 1    | 0.12   |
|        |   |        |        | 73   | 71     |
| IgA    |   |        |        | 1    | 0.30   |
|        |   |        |        |      | 0.004  |
|        |   |        |        |      | 85     |
| TGF-β1 |   |        |        |      | 1      |

Table E3. Adjusted effects of immune markers in maternal serum and in whey on ever AS in the first year of life

| Immune markers <sup>†</sup>                             | <i>Immune markers in maternal serum before delivery</i> |         | <i>Immune markers in breast milk whey</i> |         |
|---------------------------------------------------------|---------------------------------------------------------|---------|-------------------------------------------|---------|
|                                                         | RR                                                      | p-value | RR                                        | p-value |
| <i>Type-2/pro-allergic cytokines/chemokines (pg/mL)</i> |                                                         |         |                                           |         |
| IL-13                                                   |                                                         |         |                                           |         |
| 4 <sup>th</sup> quartile (high)                         | 3.04                                                    | 0.001   | 3.66                                      | 0.001   |
| 3 <sup>rd</sup> quartile                                | 2.72                                                    | 0.003   | 2.69                                      | 0.01    |
| 2 <sup>nd</sup> quartile                                | 1.07                                                    | 0.84    | 1.00                                      | 0.99    |
| IL-5                                                    |                                                         |         |                                           |         |
| 4 <sup>th</sup> quartile (high)                         | 4.44                                                    | 0.0004  | 2.53                                      | 0.004   |
| 3 <sup>rd</sup> quartile                                | 2.38                                                    | 0.05    | n/a                                       | n/a     |
| 2 <sup>nd</sup> quartile                                | 2.29                                                    | 0.07    | n/a                                       | n/a     |
| <i>T-regulatory/anti-inflammatory cytokine (pg/mL)</i>  |                                                         |         |                                           |         |
| TGF-β1                                                  |                                                         |         |                                           |         |
| 4 <sup>th</sup> quartile (high)                         | 0.55                                                    | 0.19    | 0.41                                      | 0.04    |
| 3 <sup>rd</sup> quartile                                | 0.56                                                    | 0.14    | 0.32                                      | 0.008   |
| 2 <sup>nd</sup> quartile                                | 0.32                                                    | 0.03    | 1.17                                      | 0.66    |
| <i>#Immunoglobulin A (mg/mL)</i>                        |                                                         |         |                                           |         |
| 4 <sup>th</sup> quartile (high)                         | 1.68                                                    | 0.15    | 0.34                                      | 0.04    |
| 3 <sup>rd</sup> quartile                                | n/a                                                     | n/a     | 0.77                                      | 0.55    |
| 2 <sup>nd</sup> quartile                                | n/a                                                     | n/a     | 1.36                                      | 0.44    |

<sup>†</sup>Immune markers (except for IL-5 in whey and IgA in serum) were categorized into quartiles using the first quartile (lowest values) as reference. IL-5 in whey and IgA in serum were dichotomized. IL-5, IL-13, CXCL10, IgA, and TGF-β1 serum and whey were adjusted for child's sex, maternal age during pregnancy, maternal race, smoking during pregnancy, pelvic

infections during pregnancy, maternal history of asthma, eczema, and rhinitis, consumption of antibiotics during pregnancy, season of child's birth, any respiratory infection during infancy, and household cigarette use.

# Secretory immunoglobulin A in whey but not in serum

Table E4. Adjusted effects of immune markers in maternal serum and in whey on AS at age 6 months

| Immune markers <sup>†</sup>                             | <i>Immune markers in maternal serum before delivery</i> |         | <i>Immune markers in breast milk whey</i> |         |
|---------------------------------------------------------|---------------------------------------------------------|---------|-------------------------------------------|---------|
|                                                         | RR                                                      | p-value | RR                                        | p-value |
| <i>Type-2/pro-allergic cytokines/chemokines (pg/mL)</i> |                                                         |         |                                           |         |
| IL-13                                                   |                                                         |         |                                           |         |
| 4 <sup>th</sup> quartile (high)                         | 3.96                                                    | 0.0004  | 12.84                                     | 0.001   |
| 3 <sup>rd</sup> quartile                                | 2.44                                                    | 0.02    | 5.01                                      | 0.05    |
| 2 <sup>nd</sup> quartile                                | 0.66                                                    | 0.38    | 2.33                                      | 0.32    |
| IL-5                                                    |                                                         |         |                                           |         |
| 4 <sup>th</sup> quartile (high)                         | 6.50                                                    | 0.0002  | 2.49 <sup>‡</sup>                         | 0.03    |
| 3 <sup>rd</sup> quartile                                | 2.56                                                    | 0.56    | n/a                                       | n/a     |
| 2 <sup>nd</sup> quartile                                | 1.42                                                    | 0.06    | n/a                                       | n/a     |
| <i>T-regulatory/anti-inflammatory cytokine (pg/mL)</i>  |                                                         |         |                                           |         |
| TGF-β1                                                  |                                                         |         |                                           |         |
| 4 <sup>th</sup> quartile (high)                         | 0.65                                                    | 0.45    | 0.26                                      | 0.009   |
| 3 <sup>rd</sup> quartile                                | 0.77                                                    | 0.61    | n/a                                       | n/a     |
| 2 <sup>nd</sup> quartile                                | 0.51                                                    | 0.26    | n/a                                       | n/a     |
| <i># Immunoglobulin A (mg/mL)</i>                       |                                                         |         |                                           |         |
| High levels                                             | 3.05                                                    | 0.01    | 0.24                                      | 0.003   |

<sup>†</sup>Immune markers (except for IL-5, IgA in whey and in serum and TGF-β1 in whey) were categorized into quartiles using the first quartile (lowest values) as reference. IL-5, IgA in whey and in serum and TGF-β1 in whey were dichotomized. IL-5, IL-13, CXCL10, IgA, and TGF-β1 serum and whey were adjusted for child's sex, maternal age during pregnancy, maternal race, smoking during pregnancy, pelvic infections during pregnancy, maternal history of asthma, eczema, and rhinitis, consumption of antibiotics during pregnancy, season of child's birth, any respiratory infection during the first 6 months of life, and household cigarette use.

# Secretory immunoglobulin A in whey but not in serum
